# Supplementary material for: Comparative Analysis of Functional Metagenomic Annotation and the Mappability of Short Reads
Source: PLoS One. 2014 Aug 22;9(8):e105776. doi: 10.1371/journal.pone.0105776 (PMC4141809; doi:10.1371/journal.pone.0105776)
Supplement: Table S4 — Correlation of various KO properties with KO average recall values, and pathways enriched (FDR<0.05) among the KOs in the bottom 5% of recall. (XLS) [file pone.0105776.s009.xls]

## Sheet: Recall Correlations
Database	Feature	Correlation	P-value
KEGG Ortholog SSDB	Fraction of matches to the wrong KO	-0.23	9e-42
KEGG Ortholog SSDB	%-identity of the best match to the wrong KO	-0.24	2e-46
KEGG Genes	Standard deviation of gene length	-0.21	2e-36
KEGG Genes	Coefficent of deviation of gene length	-0.23	1e-42
KEGG Genes	Number of genomes	0.18	0
KEGG Genes	Number of genes	0.08	4e-06
KEGG Genes	Genes per species	-0.24	5e-46
KEGG Genes	Standard deviation of the genes per species	-0.31	1e-75

## Sheet: Pathway Enrichment
Pathway	Description
ko00363	Bisphenol degradation
ko00310	Lysine degradation
ko00903	Limonene and pinene degradation
ko00624	Polycyclic aromatic hydrocarbon degradation
ko00627	Aminobenzoate degradation
ko00642	Ethylbenzene degradation
